# Supplementary material for: Molecular In-Depth on the Epidemiological Expansion of SARS-CoV-2 XBB.1.5
Source: MDPI journal article supplement (doi:10.3390/microorganisms11040912), 2023-03-31

# Phylogenomics of SARS-CoV-2 XBB.1.5 (GSAID CLADE 23A)

## WHO Regions

- Asia
- Oceania
- Africa
- Europe
- South America
- North America

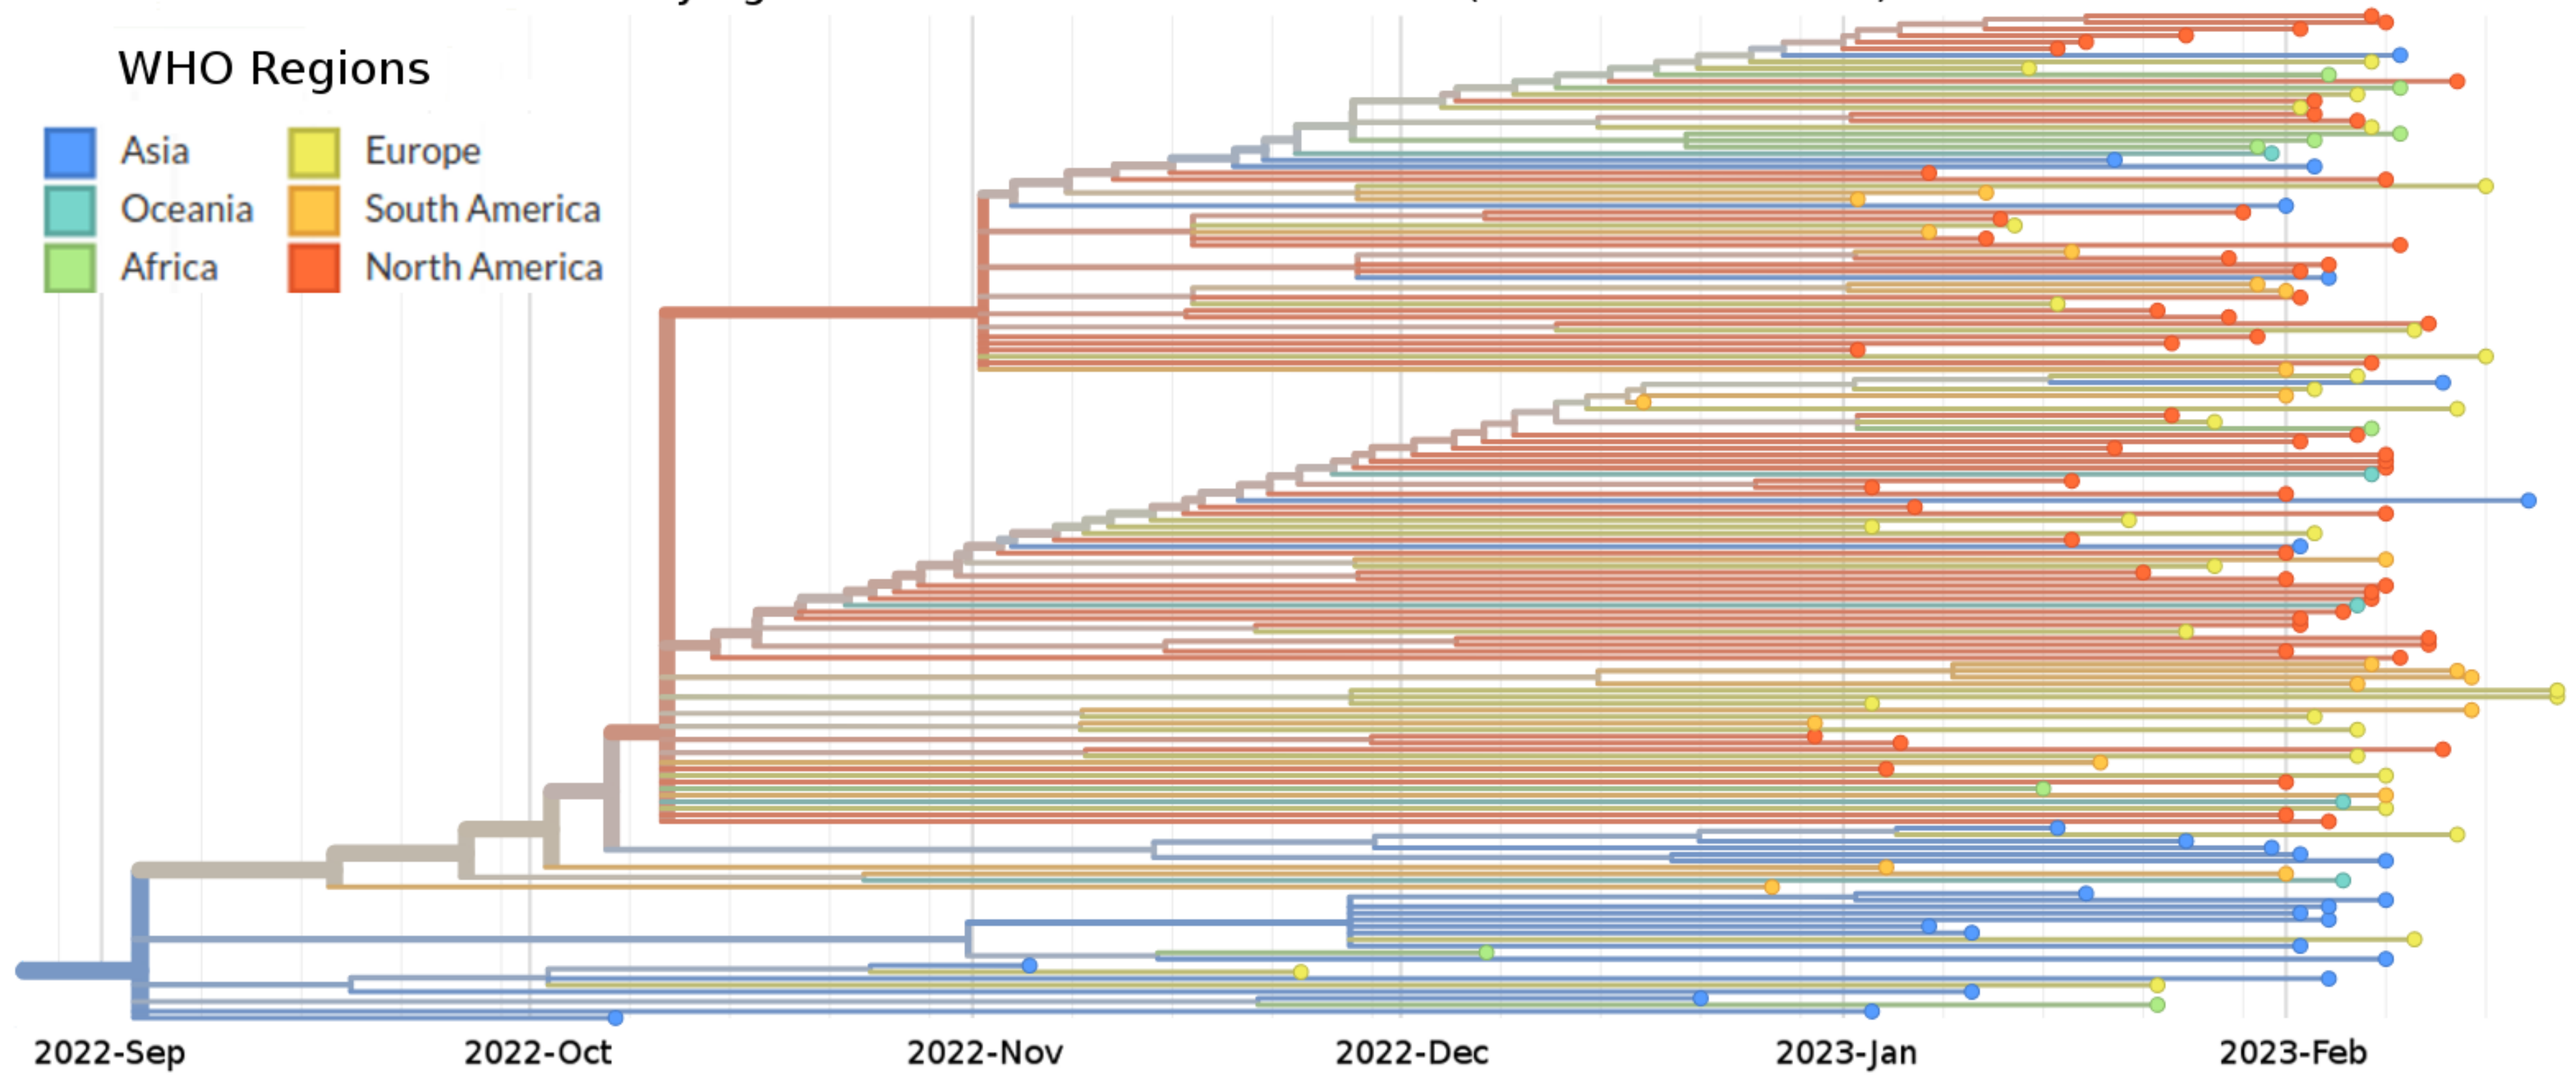

Supplement: s1 [file s1]
