# Supplementary material for: Molecular In-Depth on the Epidemiological Expansion of SARS-CoV-2 XBB.1.5
Source: MDPI journal article supplement (doi:10.3390/microorganisms11040912), 2023-03-31
Supplement: s1 [file s1]

## SUPPLEMENTAL TABLE

### **Data Availability**

GISAID Identifier: EPI\_SET\_230113ms

doi: [10.55876/gis8.230113ms](https://doi.org/10.55876/gis8.230113ms)

All genome sequences and associated metadata in this dataset are published in GISAID's EpiCoV database. To view the contributors of each individual sequence with details such as accession number, Virus name, Collection date, Originating Lab and Submitting Lab and the list of Authors, visit [10.55876/gis8.230113ms](https://gisaid.org/230113ms)

### **Data Snapshot**

- EPI\_SET\_230113ms is composed of 50 individual genome sequences.
- The collection dates range from 2022-04-01 to 2022-11-30;
- Data were collected in 13 countries and territories;
- All sequences in this dataset are compared relative to hCoV-19/Wuhan/WIV04/2019 (WIV04), the official reference sequence employed by GISAID (EPI\_ISL\_402124). Learn more at <https://gisaid.org/WIV04>.

## SUPPLEMENTAL TABLE

### **Data Availability**

GISAID Identifier: EPI\_SET\_230113ch

doi: [10.55876/gis8.230113ch](https://doi.org/10.55876/gis8.230113ch)

All genome sequences and associated metadata in this dataset are published in GISAID's EpiCoV database. To view the contributors of each individual sequence with details such as accession number, Virus name, Collection date, Originating Lab and Submitting Lab and the list of Authors, visit [10.55876/gis8.230113ch](https://gisaid.org/230113ch)

### **Data Snapshot**

- EPI\_SET\_230113ch is composed of 50 individual genome sequences.
- The collection dates range from 2022-11-21 to 2022-12-31;
- Data were collected in 12 countries and territories;
- All sequences in this dataset are compared relative to hCoV-19/Wuhan/WIV04/2019 (WIV04), the official reference sequence employed by GISAID (EPI\_ISL\_402124). Learn more at <https://gisaid.org/WIV04>.

## SUPPLEMENTAL TABLE

### **Data Availability**

GISAID Identifier: EPI\_SET\_230113rz

doi: [10.55876/gis8.230113rz](https://doi.org/10.55876/gis8.230113rz)

All genome sequences and associated metadata in this dataset are published in GISAID's EpiCoV database. To view the contributors of each individual sequence with details such as accession number, Virus name, Collection date, Originating Lab and Submitting Lab and the list of Authors, visit [10.55876/gis8.230113rz](https://gisaid.org/230113rz)

### **Data Snapshot**

- EPI\_SET\_230113rz is composed of 50 individual genome sequences.
- The collection dates range from 2022-10-16 to 2022-12-27;
- Data were collected in 15 countries and territories;
- All sequences in this dataset are compared relative to hCoV-19/Wuhan/WIV04/2019 (WIV04), the official reference sequence employed by GISAID (EPI\_ISL\_402124). Learn more at <https://gisaid.org/WIV04>.

## SUPPLEMENTAL TABLE

### **Data Availability**

GISAID Identifier: EPI\_SET\_230113nr

doi: [10.55876/gis8.230113nr](https://doi.org/10.55876/gis8.230113nr)

All genome sequences and associated metadata in this dataset are published in GISAID's EpiCoV database. To view the contributors of each individual sequence with details such as accession number, Virus name, Collection date, Originating Lab and Submitting Lab and the list of Authors, visit [10.55876/gis8.230113nr](https://gisaid.org/230113nr)

### **Data Snapshot**

- EPI\_SET\_230113nr is composed of 50 individual genome sequences.
- The collection dates range from 2022-08-16 to 2023-01-03;
- Data were collected in 14 countries and territories;
- All sequences in this dataset are compared relative to hCoV-19/Wuhan/WIV04/2019 (WIV04), the official reference sequence employed by GISAID (EPI\_ISL\_402124). Learn more at <https://gisaid.org/WIV04>.

## SUPPLEMENTAL TABLE

### **Data Availability**

GISAID Identifier: EPI\_SET\_230113qr

doi: [10.55876/gis8.230113qr](https://doi.org/10.55876/gis8.230113qr)

All genome sequences and associated metadata in this dataset are published in GISAID's EpiCoV database. To view the contributors of each individual sequence with details such as accession number, Virus name, Collection date, Originating Lab and Submitting Lab and the list of Authors, visit [10.55876/gis8.230113qr](https://gisaid.org/230113qr)

### **Data Snapshot**

- EPI\_SET\_230113qr is composed of 50 individual genome sequences.
- The collection dates range from 2022-11-05 to 2023-01-05;
- Data were collected in 12 countries and territories;
- All sequences in this dataset are compared relative to hCoV-19/Wuhan/WIV04/2019 (WIV04), the official reference sequence employed by GISAID (EPI\_ISL\_402124). Learn more at <https://gisaid.org/WIV04>.

## SUPPLEMENTAL TABLE

### **Data Availability**

GISAID Identifier: EPI\_SET\_230113nv

doi: [10.55876/gis8.230113nv](https://doi.org/10.55876/gis8.230113nv)

All genome sequences and associated metadata in this dataset are published in GISAID's EpiCoV database. To view the contributors of each individual sequence with details such as accession number, Virus name, Collection date, Originating Lab and Submitting Lab and the list of Authors, visit [10.55876/gis8.230113nv](https://gisaid.org/230113nv)

### **Data Snapshot**

- EPI\_SET\_230113nv is composed of 288 individual genome sequences.
- The collection dates range from 2022-08-27 to 2023-01-02;
- Data were collected in 23 countries and territories;
- All sequences in this dataset are compared relative to hCoV-19/Wuhan/WIV04/2019 (WIV04), the official reference sequence employed by GISAID (EPI\_ISL\_402124). Learn more at <https://gisaid.org/WIV04>.

## SUPPLEMENTAL TABLE

### **Data Availability**

GISAID Identifier: EPI\_SET\_230113vm

doi: [10.55876/gis8.230113vm](https://doi.org/10.55876/gis8.230113vm)

All genome sequences and associated metadata in this dataset are published in GISAID's EpiCoV database. To view the contributors of each individual sequence with details such as accession number, Virus name, Collection date, Originating Lab and Submitting Lab and the list of Authors, visit [10.55876/gis8.230113vm](https://gisaid.org/230113vm)

### **Data Snapshot**

- EPI\_SET\_230113vm is composed of 50 individual genome sequences.
- The collection dates range from 2022-11-30 to 2023-01-06;
- Data were collected in 15 countries and territories;
- All sequences in this dataset are compared relative to hCoV-19/Wuhan/WIV04/2019 (WIV04), the official reference sequence employed by GISAID (EPI\_ISL\_402124). Learn more at <https://gisaid.org/WIV04>.

## SUPPLEMENTAL TABLE

### **Data Availability**

GISAID Identifier: EPI\_SET\_230113ef

doi: [10.55876/gis8.230113ef](https://doi.org/10.55876/gis8.230113ef)

All genome sequences and associated metadata in this dataset are published in GISAID's EpiCoV database. To view the contributors of each individual sequence with details such as accession number, Virus name, Collection date, Originating Lab and Submitting Lab and the list of Authors, visit [10.55876/gis8.230113ef](https://gisaid.org/230113ef)

### **Data Snapshot**

- EPI\_SET\_230113ef is composed of 50 individual genome sequences.
- The collection dates range from 2022-09-08 to 2022-11-30;
- Data were collected in 16 countries and territories;
- All sequences in this dataset are compared relative to hCoV-19/Wuhan/WIV04/2019 (WIV04), the official reference sequence employed by GISAID (EPI\_ISL\_402124). Learn more at <https://gisaid.org/WIV04>.



## SUPPLEMENTAL TABLE

### **Data Availability**

GISAID Identifier: EPI\_SET\_230113da

doi: [10.55876/gis8.230113da](https://doi.org/10.55876/gis8.230113da)

All genome sequences and associated metadata in this dataset are published in GISAID's EpiCoV database. To view the contributors of each individual sequence with details such as accession number, Virus name, Collection date, Originating Lab and Submitting Lab and the list of Authors, visit [10.55876/gis8.230113da](https://gisaid.org/230113da)

### **Data Snapshot**

- EPI\_SET\_230113da is composed of 156 individual genome sequences.
- The collection dates range from 2022-08-24 to 2023-01-07;
- Data were collected in 12 countries and territories;
- All sequences in this dataset are compared relative to hCoV-19/Wuhan/WIV04/2019 (WIV04), the official reference sequence employed by GISAID (EPI\_ISL\_402124). Learn more at <https://gisaid.org/WIV04>.

## SUPPLEMENTAL TABLE

### **Data Availability**

GISAID Identifier: EPI\_SET\_230113re

doi: [10.55876/gis8.230113re](https://doi.org/10.55876/gis8.230113re)

All genome sequences and associated metadata in this dataset are published in GISAID's EpiCoV database. To view the contributors of each individual sequence with details such as accession number, Virus name, Collection date, Originating Lab and Submitting Lab and the list of Authors, visit [10.55876/gis8.230113re](https://gisaid.org/230113re)

### **Data Snapshot**

- EPI\_SET\_230113re is composed of 208 individual genome sequences.
- The collection dates range from 2022-11-08 to 2023-01-09;
- Data were collected in 7 countries and territories;
- All sequences in this dataset are compared relative to hCoV-19/Wuhan/WIV04/2019 (WIV04), the official reference sequence employed by GISAID (EPI\_ISL\_402124). Learn more at <https://gisaid.org/WIV04>.

## SUPPLEMENTAL TABLE

### **Data Availability**

GISAID Identifier: EPI\_SET\_230113yu

doi: [10.55876/gis8.230113yu](https://doi.org/10.55876/gis8.230113yu)

All genome sequences and associated metadata in this dataset are published in GISAID's EpiCoV database. To view the contributors of each individual sequence with details such as accession number, Virus name, Collection date, Originating Lab and Submitting Lab and the list of Authors, visit [10.55876/gis8.230113yu](https://gisaid.org/230113yu)

### **Data Snapshot**

- EPI\_SET\_230113yu is composed of 8 individual genome sequences.
- The collection dates range from 2023-01-07 to 2023-01-08;
- Data were collected in 3 countries and territories;
- All sequences in this dataset are compared relative to hCoV-19/Wuhan/WIV04/2019 (WIV04), the official reference sequence employed by GISAID (EPI\_ISL\_402124). Learn more at <https://gisaid.org/WIV04>.
