# Supplementary material for: Molecular In-Depth on the Epidemiological Expansion of SARS-CoV-2 XBB.1.5
Source: MDPI journal article supplement (doi:10.3390/microorganisms11040912), 2023-03-31
Supplement: s1 [file s1]

**Table S1.** Spike variant mutations of compared lineages.

|            | <b>BA.2</b> | <b>XBB</b> | <b>XBB.1</b> | <b>XBB.1.5</b> |
|------------|-------------|------------|--------------|----------------|
| <b>NTD</b> | T19I        | T19I       | T19I         | T19I           |
|            | L24S        | L24S       | L24S         | L24S           |
|            | P25         | P25        | P25          | P25            |
|            | P26         | P26        | P26          | P26            |
|            | A27         | A27        | A27          | A27            |
|            |             | V83A       | V83A         | V83A           |
|            | G142D       | G142D      | G142D        | G142D          |
|            |             | Y144       | Y144         | Y144           |
|            |             | H146Q      | H146Q        | H146Q          |
|            |             | Q183E      | Q183E        | Q183E          |
|            | V213G       | V213E      | V213E        | V213E          |
|            |             |            | G252V        | G252V          |
| <b>RBD</b> | G339D       | G339H      | G339H        | G339H          |
|            |             | R346T      | R346T        | R346T          |
|            |             | L368I      | L368I        | L368I          |
|            | S371F       | S371F      | S371F        | S371F          |
|            | S373P       | S373P      | S373P        | S373P          |
|            | S375F       | S375F      | S375F        | S375F          |
|            | T376A       | T376A      | T376A        | T376A          |
|            | D405N       | D405N      | D405N        | D405N          |
|            | R408S       | R408S      | R408S        | R408S          |
|            | K417N       | K417N      | K417N        | K417N          |
|            | N440K       | N440K      | N440K        | N440K          |
|            |             | V445P      | V445P        | V445P          |
|            |             | G446S      | G446S        | G446S          |
|            |             | N460K      | N460K        | N460K          |
|            | S477N       | S477N      | S477N        | S477N          |
|            | T478K       | T478K      | T478K        | T478K          |
|            | E484A       | E484A      | E484A        | E484A          |
|            |             | F486S      | F486S        | <b>F486P</b>   |

|  |       |       |       |       |
|--|-------|-------|-------|-------|
|  |       | F490S | F490S | F490S |
|  | Q493R |       |       |       |
|  | Q498R | Q498R | Q498R | Q498R |
|  | N501Y | N501Y | N501Y | N501Y |
|  | Y505H | Y505H | Y505H | Y505H |
|  | D614G | D614G | D614G | D614G |
|  | H655Y | H655Y | H655Y | H655Y |
|  | N679K | N679K | N679K | N679K |
|  | P681H | P681H | P681H | P681H |
|  | N764K | N764K | N764K | N764K |
|  | D796Y | D796Y | D796Y | D796Y |
|  | Q954H | Q954H | Q954H | Q954H |
|  | N969K | N969K | N969K | N969K |
|  |       |       |       |       |
