# Supplementary material for: Molecular In-Depth on the Epidemiological Expansion of SARS-CoV-2 XBB.1.5
Source: Microorganisms. 2023 Mar 31;11(4):912. doi: 10.3390/microorganisms11040912 (PMC10142263; doi:10.3390/microorganisms11040912)
Supplement: Supplementary file 1 [file microorganisms-11-00912-s001.zip]

Archive with 4 entries (4 files):
- Figure_S1.pdf
- Figure_S2.pdf
- File_S1.pdf
- Table_S1.pdf
