# Supplementary figures and images for: Molecular In-Depth on the Epidemiological Expansion of SARS-CoV-2 XBB.1.5
Source: MDPI journal article supplement (doi:10.3390/microorganisms11040912), 2023-03-31

**BA.2**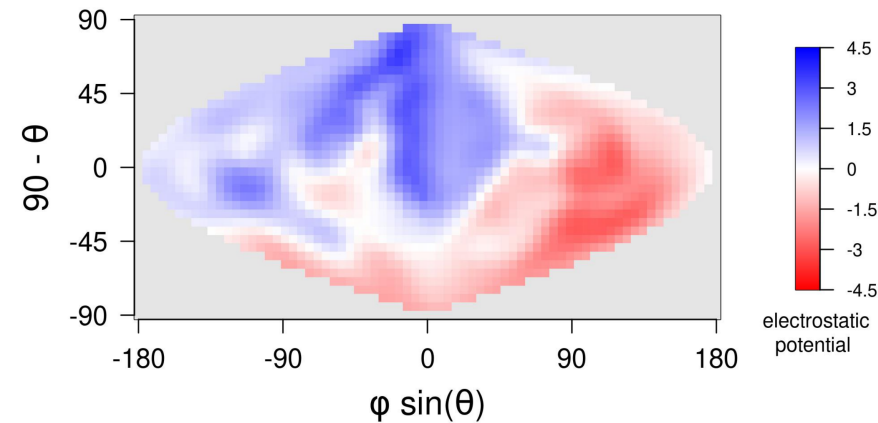**XBB**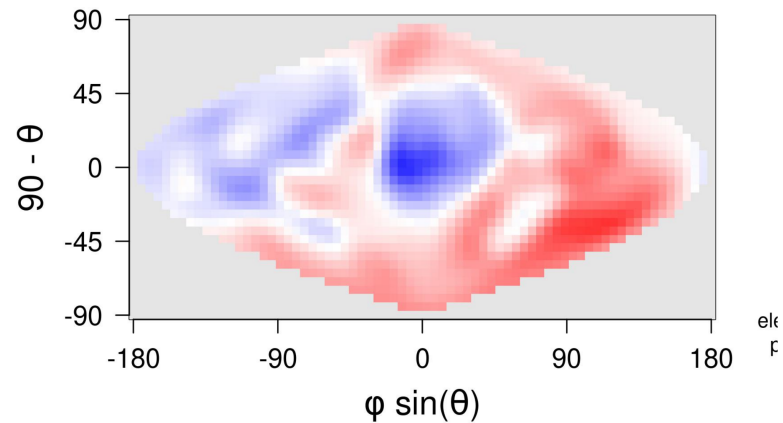**XBB.1/XBB.1.5**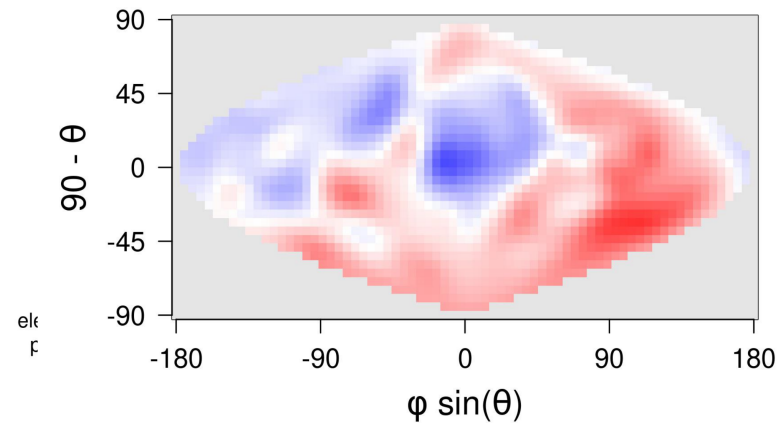

Supplement: s1 [file s1]
